# Supplementary material for: Vascular Complications in Patients with Hepatocellular Carcinoma Treated with Sorafenib
Source: PubMed Central journal article supplement (PMC7602103; doi:10.3390/cancers12102961), 2020-10-13

Supplementary Material

# Vascular Complications in Patients with Hepatocellular Carcinoma Treated with Sorafenib

Katharina Pomej, Bernhard Scheiner, Dabin Park, David Bauer, Lorenz Balcar, Tobias Meischl, Mattias Mandorfer, Thomas Reiberger, Christian Müller, Michael Trauner and Matthias Pinter

**Table S1.** Comparison of baseline characteristics between patients who did versus did not experience thromboembolic complications during sorafenib treatment.

|                                                    |                | Without thromboembolic complication (n=244) | With thromboembolic complication (n=8) | p-value      |
|----------------------------------------------------|----------------|---------------------------------------------|----------------------------------------|--------------|
|                                                    |                | Number (%) or mean±SD / median (range)      |                                        |              |
| <b>Age (years)</b>                                 |                | 65±9.5                                      | 66±7.7                                 | <b>0.748</b> |
| <b>Sex</b>                                         | Male           | 209 (86%)                                   | 6 (75%)                                | <b>0.333</b> |
|                                                    | Female         | 35 (14%)                                    | 2 (25%)                                |              |
| <b>Etiology</b>                                    | ALD            | 90 (37%)                                    | 3 (38%)                                | <b>0.160</b> |
|                                                    | Viral          | 70 (29%)                                    | 1 (12%)                                |              |
|                                                    | Unknown        | 49 (20%)                                    | 4 (50%)                                |              |
|                                                    | Other          | 35 (14%)                                    | -                                      |              |
| <b>Cirrhosis</b>                                   | Yes            | 182 (75%)                                   | 6 (75%)                                | <b>1.000</b> |
| <b>Child-Pugh Classification</b>                   | A              | 108 (44%)                                   | 6 (75%)                                | <b>0.184</b> |
|                                                    | B              | 93 (38%)                                    | 2 (25%)                                |              |
|                                                    | C              | 43 (18%)                                    | -                                      |              |
| <b>ECOG PS</b>                                     | 0              | 144 (59%)                                   | 5 (63%)                                | <b>0.898</b> |
|                                                    | ≥1             | 100 (41%)                                   | 3 (37%)                                |              |
| <b>Macrovascular invasion</b>                      | Yes            | 118 (48%)                                   | 6 (75%)                                | <b>0.172</b> |
| <b>Extrahepatic Metastases</b>                     | Yes            | 73 (30%)                                    | 3 (38%)                                | <b>0.702</b> |
| <b>BCLC stage</b>                                  | A              | 17 (7%)                                     | 1 (13%)                                | <b>0.216</b> |
|                                                    | B              | 47 (19%)                                    | -                                      |              |
|                                                    | C              | 139 (57%)                                   | 7 (87%)                                |              |
|                                                    | D              | 41 (17%)                                    | -                                      |              |
| <b>Prior therapy</b>                               | None           | 137 (56%)                                   | 4 (50%)                                | <b>0.856</b> |
|                                                    | TACE/MWA/RFA   | 57 (23%)                                    | 2 (25%)                                |              |
|                                                    | Resection      | 11 (5%)                                     | 1 (13%)                                |              |
|                                                    | Other          | 39 (16%)                                    | 1 (12%)                                |              |
| <b>AFP (IU/mL)</b>                                 | Median (range) | 50 (0.8-50000)                              | 32 (32-2.5)                            | <b>0.840</b> |
| <b>Platelet Count (G/L)</b>                        | Median (range) | 146 (29-778)                                | 237 (115-425)                          | <b>0.076</b> |
| <b>Diabetes</b>                                    | Yes            | 91 (37%)                                    | 4 (50%)                                | <b>0.480</b> |
|                                                    | No             | 153 (63%)                                   | 4 (50%)                                |              |
| <b>BMI (kg/m<sup>2</sup>)</b>                      | Mean±SD        | 26±5.7                                      | 26±4.7                                 | <b>0.908</b> |
| <b>Obesity (BMI ≥ 30kg/m<sup>2</sup>)</b>          | Yes            | 56 (23%)                                    | 2 (25%)                                | <b>1.000</b> |
| <b>Arterial Hypertension</b>                       | Yes            | 152 (62%)                                   | 2 (25%)                                | <b>0.057</b> |
| <b>Antihypertensive treatment</b>                  | Yes            | 111 (45%)                                   | 1 (12%)                                | <b>0.079</b> |
| <b>Smoking</b>                                     | Yes            | 100 (41%)                                   | 6 (75%)                                | <b>0.072</b> |
| <b>Hypercholesterinemia (cut-off &gt;200mg/dL)</b> | Yes            | 53 (22%)                                    | 2 (25%)                                | <b>1.000</b> |
| <b>Statin therapy</b>                              | Yes            | 36 (15%)                                    | 2 (25%)                                | <b>0.346</b> |
| <b>Hypertriglyceridemia (cut-off &gt;200mg/dL)</b> | Yes            | 14 (6%)                                     | 2 (25%)                                | <b>0.098</b> |

|                                   |     |         |         |              |
|-----------------------------------|-----|---------|---------|--------------|
| <b>Coronary heart disease</b>     | Yes | 23 (9%) | -       | <b>1.000</b> |
| <b>Arterial occlusive disease</b> | Yes | 20 (8%) | 2 (25%) | <b>0.148</b> |

Abbreviations: AFP,  $\alpha$ -fetoprotein; ALD, alcoholic liver disease; BCLC, Barcelona clinic liver cancer; BMI, Body Mass Index; ECOG PS, Eastern Cooperative Oncology Group performance status; MWA, microwave ablation; RFA, radiofrequency ablation; TACE, transarterial chemoembolization;.

**Table S2.** Univariate analysis of prognostic factors for overall survival in patients with HCC treated with sorafenib.

|                                                    |                  | Overall survival (months) |        |           | p-value (log rank) |
|----------------------------------------------------|------------------|---------------------------|--------|-----------|--------------------|
|                                                    |                  | N                         | Median | 95% CI    |                    |
| <b>Age</b>                                         | < 65 years       | 112                       | 10.9   | 8.6-13.3  | <b>0.515</b>       |
|                                                    | ≥ 65 years       | 140                       | 8.9    | 7.1-10.6  |                    |
| <b>Gender</b>                                      | Male             | 215                       | 10.2   | 8.4-12.1  | <b>0.237</b>       |
|                                                    | Female           | 37                        | 7.2    | 4.4-10.1  |                    |
| <b>Child-Pugh Classification</b>                   | A                | 114                       | 13.0   | 10.5-15.3 | <b>0.000</b>       |
|                                                    | B                | 95                        | 7.8    | 6.0-9.6   |                    |
|                                                    | C                | 43                        | 4.5    | 1.2-7.8   |                    |
| <b>Cardiovascular risk (Framingham risk score)</b> | Low/intermediate | 119                       | 10.0   | 6.8-13.2  | <b>0.055</b>       |
|                                                    | High             | 54                        | 7.4    | 3.4-11.3  |                    |
| <b>Ascites</b>                                     | No               | 146                       | 12.5   | 9.9-15.1  | <b>0.000</b>       |
|                                                    | Yes              | 106                       | 6.0    | 3.7-8.4   |                    |
| <b>ECOG PS</b>                                     | 0                | 149                       | 11.5   | 8.0-15.1  | <b>0.000</b>       |
|                                                    | ≥ 1              | 103                       | 6.6    | 4.0-9.1   |                    |
| <b>Macrovascular Invasion</b>                      | No               | 125                       | 12.3   | 9.9-14.7  | <b>0.002</b>       |
|                                                    | Yes              | 124                       | 7.3    | 5.5-9.1   |                    |
| <b>Extrahepatic spread</b>                         | No               | 174                       | 10.0   | 8.3-11.7  | <b>0.722</b>       |
|                                                    | Yes              | 76                        | 7.9    | 3.5-12.3  |                    |
| <b>BCLC stage</b>                                  | A                | 18                        | 13.0   | 8.6-17.3  | <b>0.000</b>       |
|                                                    | B                | 47                        | 12.0   | 9.9-14.4  |                    |
|                                                    | C                | 146                       | 9.4    | 7.4-11.5  |                    |
|                                                    | D                | 41                        | 4.5    | 1.3-7.8   |                    |
| <b>AFP (IU/mL)</b>                                 | ≤200             | 134                       | 10.9   | 9.1-12.7  | <b>0.001</b>       |
|                                                    | >200             | 87                        | 5.4    | 2.3-8.5   |                    |

Abbreviations: AFP,  $\alpha$ -fetoprotein; BCLC, Barcelona clinic liver cancer; ECOG PS, Eastern Cooperative Oncology Group performance status.

**Table S3.** Association of baseline characteristics with the occurrence of bleeding events.

|                                  |         | Without bleeding complication (n=204)  | With bleeding complication (n=48) | p-value      |
|----------------------------------|---------|----------------------------------------|-----------------------------------|--------------|
|                                  |         | Number (%) or mean±SD / median (range) |                                   |              |
| <b>Age (years)</b>               |         | 65±9.6                                 | 66±8.5                            | <b>0.875</b> |
| <b>Sex</b>                       | Male    | 172 (84%)                              | 43 (90%)                          | <b>0.353</b> |
|                                  | Female  | 32 (16%)                               | 5 (10%)                           |              |
| <b>Etiology</b>                  | ALD     | 76 (37%)                               | 17 (35%)                          | <b>0.764</b> |
|                                  | Viral   | 55 (27%)                               | 16 (33%)                          |              |
|                                  | Unknown | 45 (22%)                               | 8 (17%)                           |              |
|                                  | Other   | 28 (14%)                               | 7 (15%)                           |              |
| <b>Cirrhosis</b>                 | Yes     | 148 (73%)                              | 40 (83%)                          | <b>0.270</b> |
| <b>Child-Pugh Classification</b> | A       | 94 (46%)                               | 20 (42%)                          | <b>0.718</b> |
|                                  | B       | 77 (38%)                               | 18 (37%)                          |              |
|                                  | C       | 33 (16%)                               | 10 (21%)                          |              |
| <b>ECOG PS</b>                   | 0       | 120 (59%)                              | 29 (60%)                          | <b>0.973</b> |

|                                   |                |                |               |              |
|-----------------------------------|----------------|----------------|---------------|--------------|
|                                   | ≥1             | 84 (41%)       | 19 (40%)      |              |
| <b>Macrovascular invasion</b>     | Yes            | 101 (50%)      | 23 (48%)      | <b>0.772</b> |
| <b>Extrahepatic Metastases</b>    | Yes            | 63 (31%)       | 13 (27%)      | <b>0.578</b> |
| <b>BCLC stage</b>                 | A              | 13 (6%)        | 5 (10%)       | <b>0.547</b> |
|                                   | B              | 39 (19%)       | 8 (17%)       |              |
|                                   | C              | 121 (59%)      | 25 (52%)      |              |
|                                   | D              | 31 (15%)       | 10 (21%)      |              |
| <b>Prior therapy</b>              | None           | 117 (57%)      | 24 (50%)      | <b>0.347</b> |
|                                   | TACE/MWA/RFA   | 46 (23%)       | 13 (27%)      |              |
|                                   | Resection      | 9 (4%)         | 3 (6%)        |              |
|                                   | Other          | 32 (16%)       | 8 (17%)       |              |
| <b>AFP (IU/mL)</b>                | Median (range) | 45 (0.8-50000) | 108 (1-50000) | <b>0.503</b> |
| <b>Platelet Count (G/L)</b>       | Median (range) | 145 (29-778)   | 154 (47-420)  | <b>0.942</b> |
| <b>Arterial Hypertension</b>      | Yes            | 123 (60%)      | 31 (65%)      | <b>0.636</b> |
| <b>Antihypertensive treatment</b> | Yes            | 90 (44%)       | 22 (46%)      | <b>0.830</b> |
| <b>Smoking</b>                    | Yes            | 84 (41%)       | 22 (46%)      | <b>0.557</b> |
| <b>Coronary heart disease</b>     | Yes            | 20 (10%)       | 3 (6%)        | <b>0.583</b> |
| <b>Arterial occlusive disease</b> | Yes            | 19 (9%)        | 3 (6%)        | <b>0.776</b> |
| <b>Anticoagulation</b>            | Yes            | 27 (13%)       | 10 (21%)      | <b>0.186</b> |
| <b>Antiplatelet therapy</b>       | Yes            | 33 (16%)       | 4 (8%)        | <b>0.404</b> |

Abbreviations: AFP,  $\alpha$ -fetoprotein; ALD, alcoholic liver disease; BCLC, Barcelona clinic liver cancer; BMI, Body Mass Index; ECOG PS, Eastern Cooperative Oncology Group performance status; MWA, microwave ablation; RFA, radiofrequency ablation; TACE, transarterial chemoembolization;.

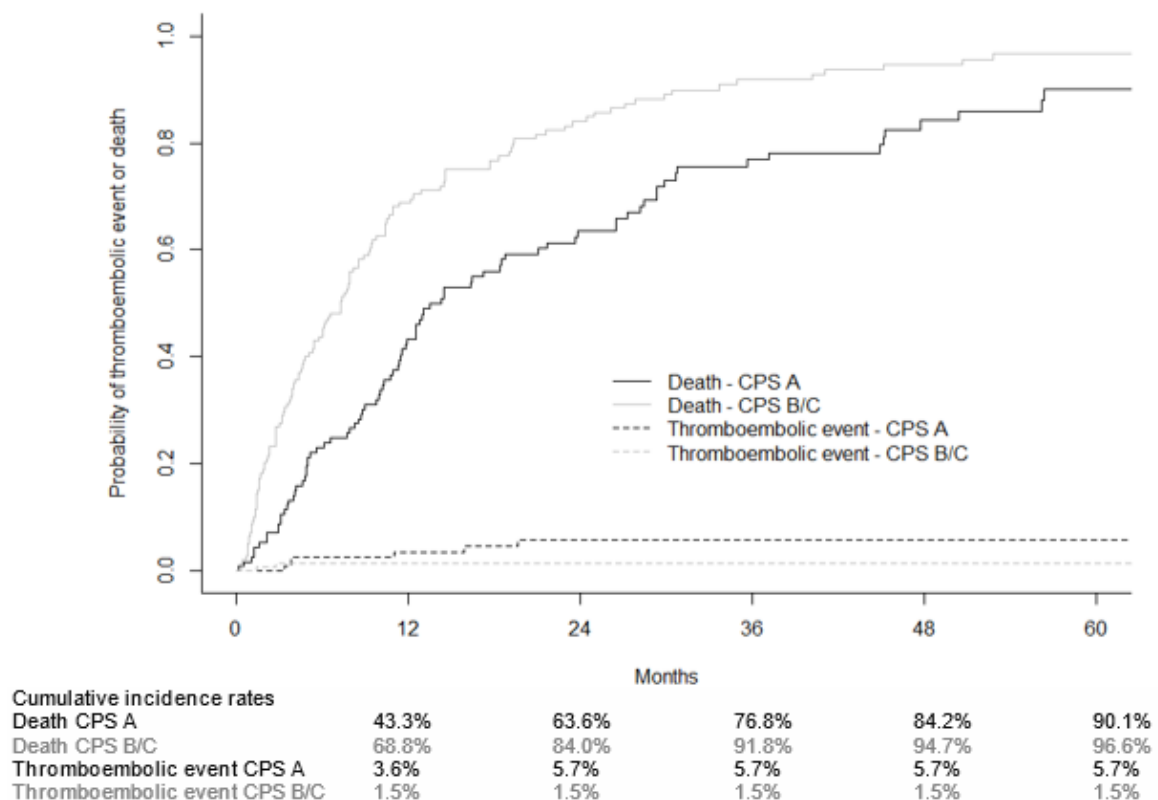

**Figure S1.** Competing risk analysis comparing the cumulative incidence of thromboembolic events in Child-Pugh A vs. B/C patients. Abbreviations: CPS, Child-Pugh-Score

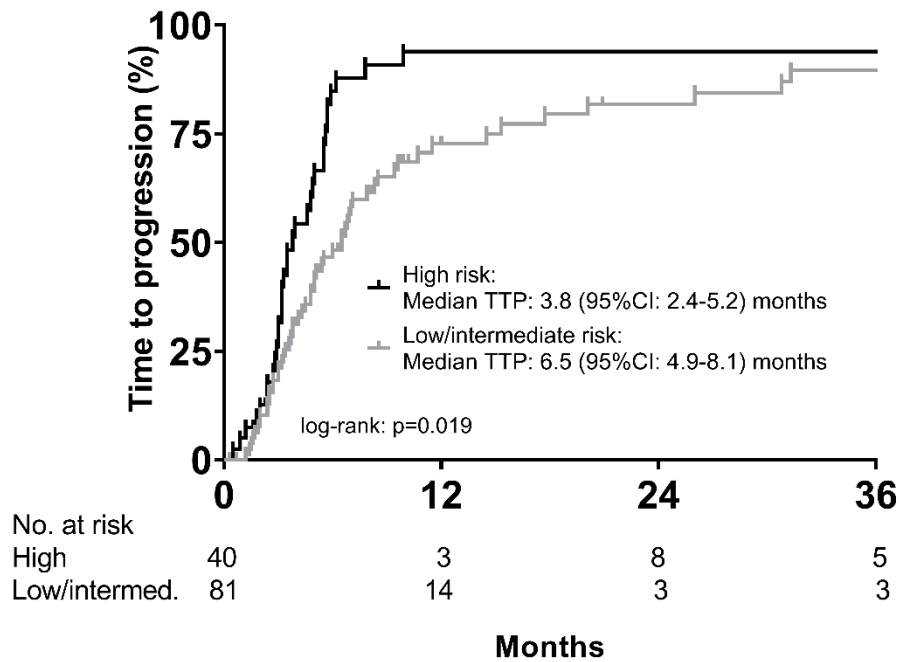

**Figure S2.** Time to progression (TTP) of patients with low/intermediate risk vs. high risk according to Framingham score. Abbreviations: TTP, time to progression

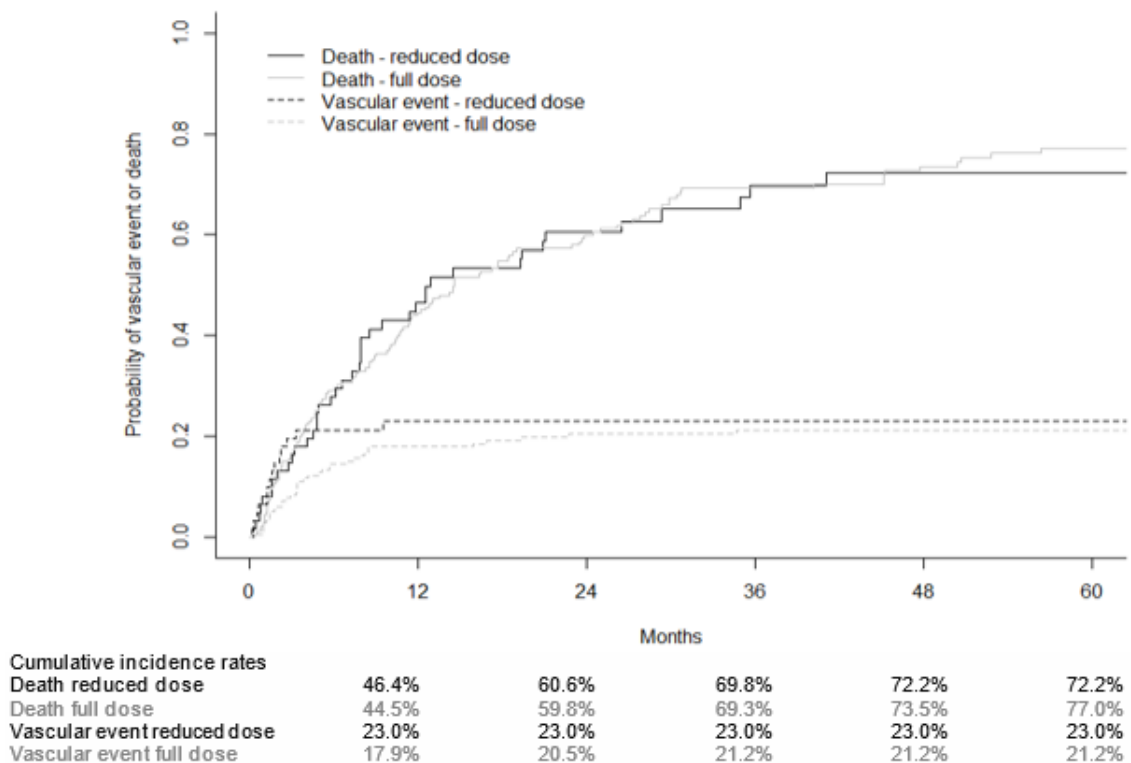

**Figure S3.** Competing risk analysis of the development of vascular events (thromboembolic and bleeding) with respect to sorafenib starting dose, considering death as competing risk.

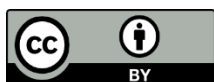

Supplement: cancers-12-02961-s001.pdf [file cancers-12-02961-s001.pdf]
